# Supplementary material for: From Absorption Shifts to Frontier Orbitals: A Comprehensive Optical Study of a Cyano-Functionalized Liquid Crystal
Source: Research Square preprint supplement (doi:10.21203/rs.3.rs-7200415/v1), 2025-08-29
Supplement: Supplementary file 1 [file ada63a3be4169be49bdcfc0b.docx]

(a)


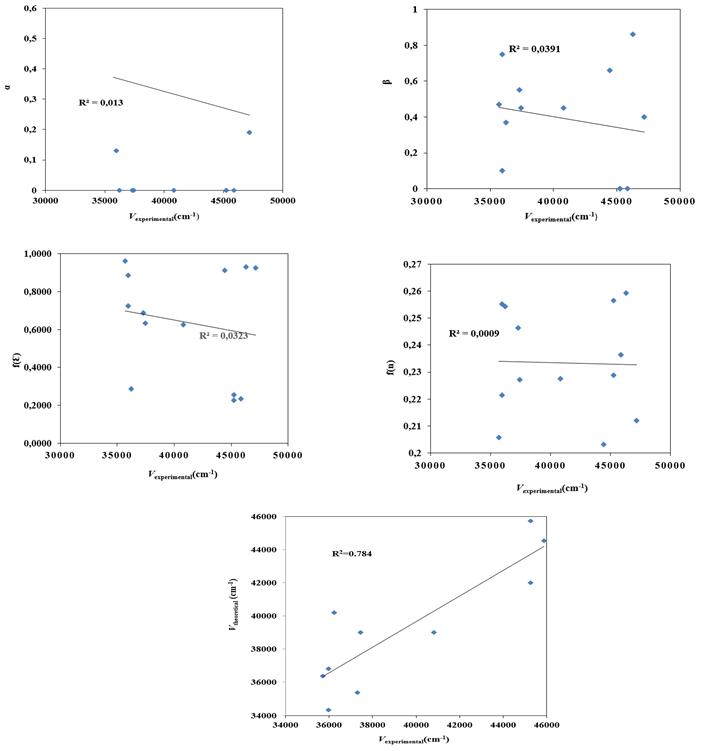

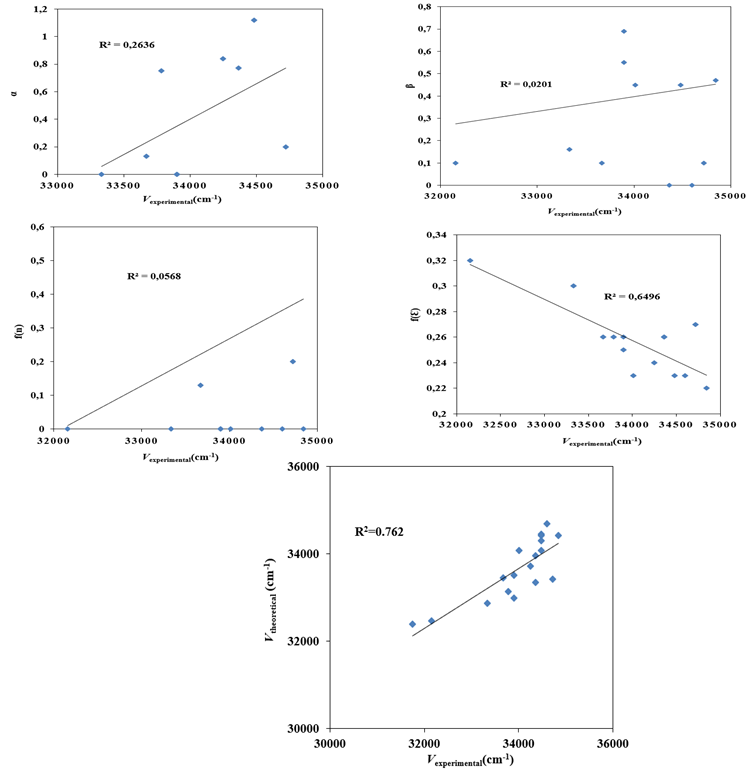


(b)

**Figure 1S.** Correlation plots between KAT parameters and experimental absorption maxima (HOBC1 (a) and HOBC2 (b)). Significant influence observed from *β* and *f(n)*.


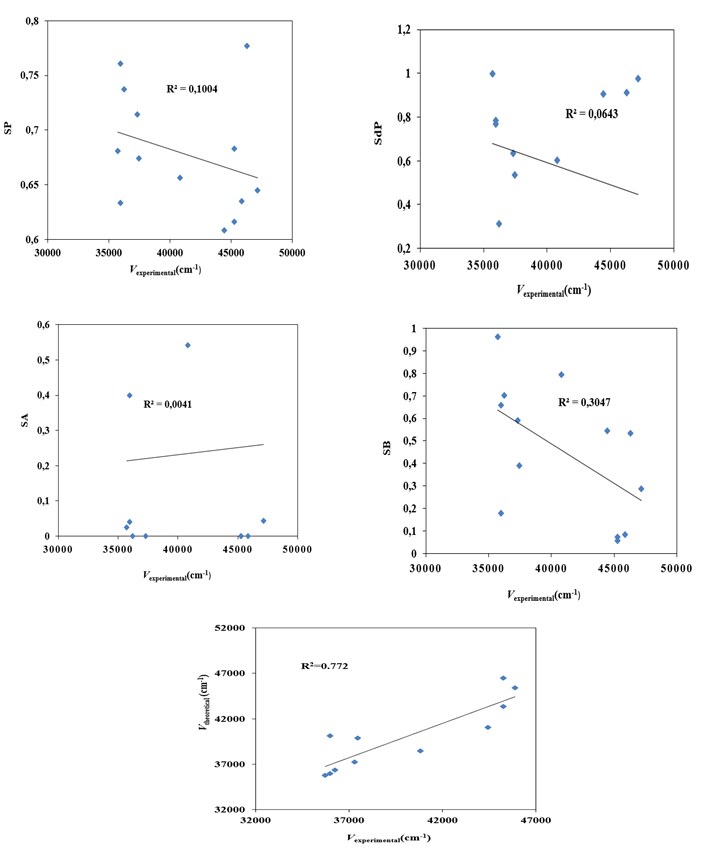


(a)


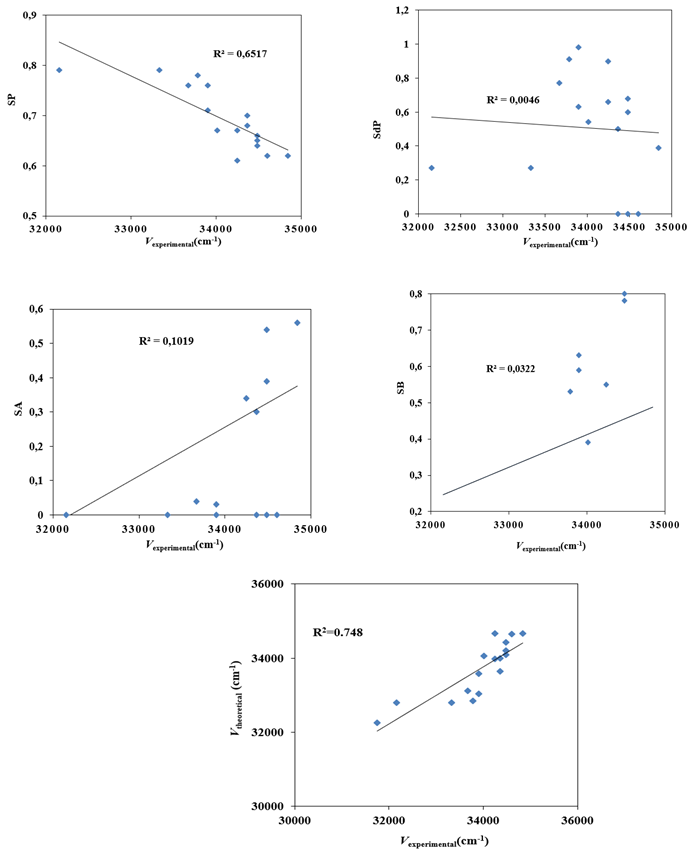


(b)

**Figure 2S.** Correlations between CAT parameters and absorption maxima of HOBC1 and HOBC2. SP and SdP are key descriptors in solvent-dependent shifts.


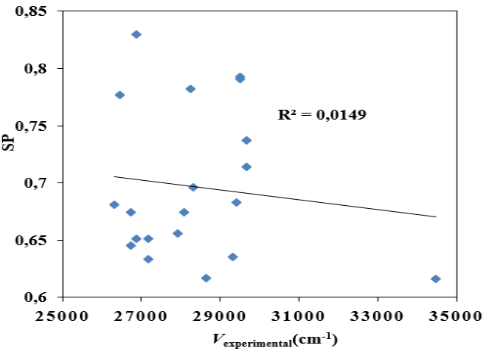

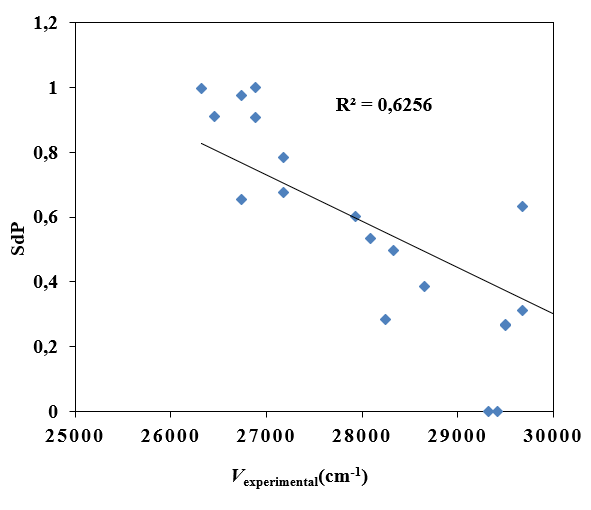

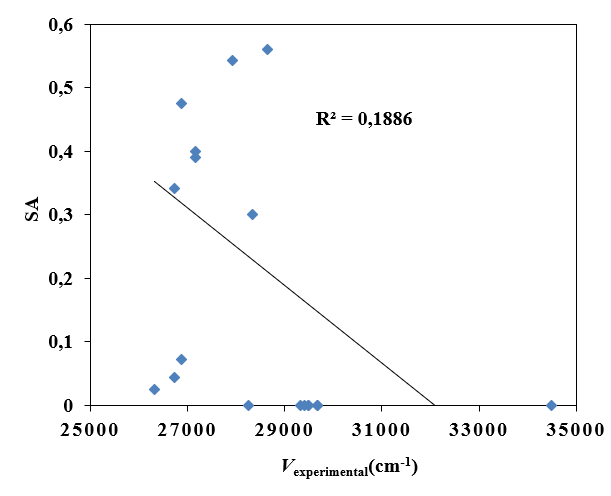

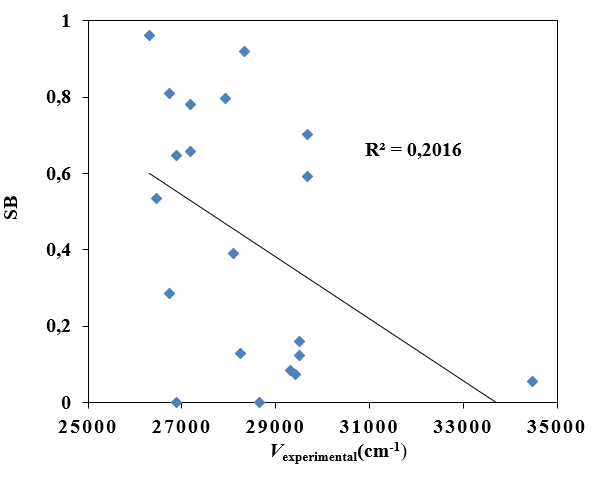

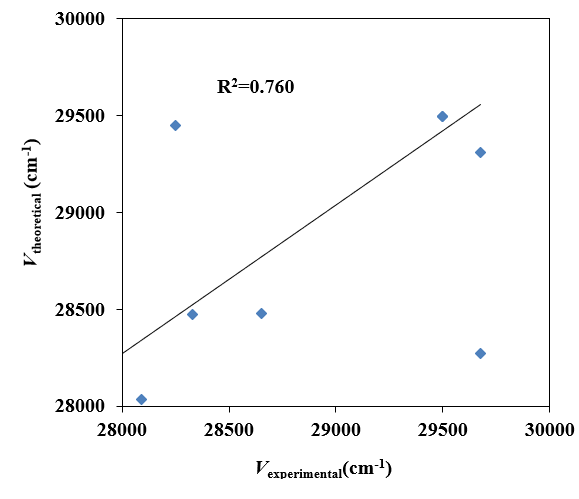

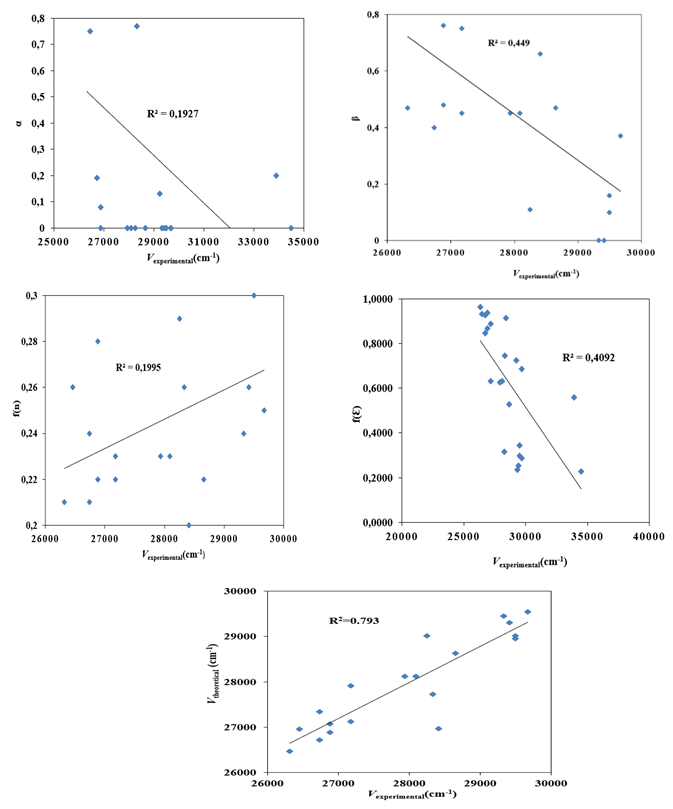


(a)

(b)

**Figure 3S.** Correlation of maximum fluorescence frequencies of HOBC with KAT and CAT parameters. f(ε) and SB are influential in emission behavio

**Table 1S.** List of all used parameters and functions[4-18].

| ***Solvents*** | ***εa,b*** | ***na,b*** | ***βa,b*** | ***αa,b*** | ***f(ε)a,b*** | ***f(n)a,b*** | ***SPc*** | ***SdPc*** | ***SAc*** | ***SBc*** | ***f(ε,n)d,e,f*** | ***g(n)d,e,f*** | ***f(ε,n)+2g(n)d,e,f*** | ***FL-M(ε,n)g,h*** | ***FB(ε,n)ı*** | ***FK-C-V(ε,n)i*** | ***b*** |
| --- | --- | --- | --- | --- | --- | --- | --- | --- | --- | --- | --- | --- | --- | --- | --- | --- | --- |
| ***n*-Hexane** | 1.88 | 1.3749 | 0 | 0 | 0.2268 | 0.616 | 0.616 | 0 | 0 | 0.056 | -0.00253 | 0.25505 | 0.507572 | -0.00136 | -0.00253 | 0.253786 | 0.009 |
| ***n*-Heptane** | 1.92 | 1.3889 | 0 | 0 | 0.2347 | 0.635 | 0.635 | 0 | 0 | 0.083 | -0.00218 | 0.264411 | 0.526644 | -0.00115 | -0.00218 | 0.263322 | 0.012 |
| **Cyclohexane** | 2.02 | 1.4266 | 0 | 0 | 0.2537 | 0.683 | 0.683 | 0 | 0 | 0.073 | -0.00353 | 0.289447 | 0.575364 | -0.00178 | -0.00353 | 0.287682 | 0.006 |
| **1.4Dioxane** | 2.21 | 1.4224 | 0.37 | 0 | 0.2874 | 0.737 | 0.737 | 0.312 | 0 | 0.701 | 0.041496 | 0.286671 | 0.614837 | 0.020486 | 0.041496 | 0.307418 | 0.164 |
| **Benzene** | 2.27 | 1.5589 | 0.1 | 0 | 0.2974 | 0.793 | 0.793 | 0.27 | 0 | 0.124 | -0.0336 | 0.374933 | 0.716265 | -0.0148 | -0.0336 | 0.358132 | - |
| **O-Xylene** | 2.57 | 1.5054 | 0.16 | 0 | 0.3435 | 0.791 | 0.791 | 0.266 | 0 | 0.16 | 0.060615 | 0.340849 | 0.742313 | 0.026828 | 0.060615 | 0.371156 | 0.111 |
| **Diethylether** | 4.34 | 1.3497 | 0.47 | 0 | 0.5268 | 0.617 | 0.617 | 0.385 | 0.56 | 0 | 0.378848 | 0.238121 | 0.85509 | 0.168082 | 0.378848 | 0.427545 | 0.117 |
| **Ethylacetate** | 6.02 | 1.3724 | 0.45 | 0 | 0.6259 | 0.656 | 0.656 | 0.603 | 0.542 | 0.795 | 0.489081 | 0.253375 | 0.995831 | 0.199635 | 0.489081 | 0.497916 | 0.228 |
| **n-Butylacetate** | 6.17 | 1.3719 | 0.45 | 0 | 0.6328 | 0.674 | 0.674 | 0.535 | 0.689 | 0.39 | 0.497736 | 0.25304 | 1.003815 | 0.202403 | 0.497736 | 0.501908 | 0.241 |
| **Acedic acide** | 6.17 | 1.3719 | 0.45 | 1.12 | 0.6328 | 0.651 | 0.651 | 0.676 | 0.39 | 0.781 | 0.497736 | 0.25304 | 1.003815 | 0.202403 | 0.497736 | 0.501908 | 0.648 |
| **THF** | 7.58 | 1.4072 | 0.55 | 0 | 0.6868 | 0.714 | 0.714 | 0.634 | 0 | 0.591 | 0.549078 | 0.276596 | 1.10227 | 0.209572 | 0.549078 | 0.551135 | 0.207 |
| **DCM** | 8.93 | 1.4242 | 0.1 | 0.13 | 0.7255 | 0.761 | 0.761 | 0.769 | 0.04 | 0.178 | 0.590293 | 0.287861 | 1.166014 | 0.217103 | 0.590293 | 0.583007 | 0.309 |
| **1-Octanol** | 9.8 | 1.429 | 0.81 | 0.77 | 0.7458 | 0.696 | 0.696 | 0.496 | 0.3 | 0.92 | 0.613759 | 0.291031 | 1.195822 | 0.222223 | 0.613759 | 0.597911 | 0.537 |
| **1-Butanol** | 17.4 | 1.399 | 0.84 | 0.84 | 0.8454 | 0.674 | 0.674 | 0.655 | 0.341 | 0.809 | 0.749445 | 0.271143 | 1.291732 | 0.263326 | 0.749445 | 0.645866 | 0.586 |
| **Ethanol** | 24.55 | 1.3614 | 0.75 | 0.86 | 0.8870 | 0.633 | 0.633 | 0.783 | 0.4 | 0.658 | 0.812933 | 0.245993 | 1.304918 | 0.288746 | 0.812933 | 0.652459 | 0.654 |
| **Methanol** | 32.66 | 1.3284 | 0.66 | 0.98 | 0.9134 | 0.608 | 0.608 | 0.904 | 0.605 | 0.545 | 0.85461 | 0.22374 | 1.302089 | 0.30856 | 0.85461 | 0.651045 | 0.762 |
| **DMF** | 36.71 | 1.4305 | 0.69 | 0 | 0.9225 | 0.759 | 0.759 | 0.977 | 0.031 | 0.631 | 0.835593 | 0.292021 | 1.419635 | 0.274386 | 0.835593 | 0.709818 | 0.386 |
| **Acetonitrile** | 38.8 | 1.3442 | 0.4 | 0.19 | 0.9265 | 0.645 | 0.645 | 0.974 | 0.044 | 0.286 | 0.865962 | 0.234414 | 1.334789 | 0.306031 | 0.865962 | 0.667395 | 0.46 |
| **Ethylene glycol** | 41.4 | 1.4318 | 0.86 | 0.75 | 0.9309 | 0.777 | 0.777 | 0.91 | 0.717 | 0.534 | 0.845734 | 0.292879 | 1.431491 | 0.276212 | 0.845734 | 0.715746 | 0.79 |
| **DMSO** | 46.45 | 1.4793 | 0.76 | 0 | 0.9381 | 0.83 | 0.83 | 1 | 0.072 | 0.647 | 0.840013 | 0.323973 | 1.48796 | 0.263009 | 0.840013 | 0.74398 | 0.444 |
| **Water** | 78.36 | 1.333 | 0.47 | 1.17 | 0.9627 | 0.681 | 0.681 | 0.997 | 0.025 | 0.962 | 0.912678 | 0.226851 | 1.36638 | 0.319886 | 0.912678 | 0.68319 | 1 |

aM.J. Kamlet. J.L.M. Abboud. M.H. Abraham. R.W. Taft. Linear Solvation Energy Relationships. J Org Chem 48 (1983) 2877-2888.

bC. Reichardt. Solvents and Solvent Effects in Organic Chemistry. Third ed. Weinheim. Germany:Wiley-VCH. 2005.

cJ. Catalán. Toward a generalized treatment of the solvent effect based on four empirical scales: dipolarity (SdP. a New Scale). polarizability (SP). acidity (SA). and basicity (SB) of the medium. J Phy Chem B 113. (17) (2009) 5951–5960.

dL. Bilot. A. Kawski. Zur Theorie des Einflusses von Lösungsmitteln auf die Elektronenspektren der Moleküle. Zeitschrift für Naturforschung A 17 (1962) 621-627.

eA. Kawski. Zur Lösungsmittelabhängigkeit der Wellenzahl von Elektronenbanden Lumineszierender Moleküle und über die Bestimmung der Elektrischen Dipolmomente im Anregungszustand. Acta Phys Polon 29 (1966) 507-518.

fE. Lippert. Dipol moment und Elektronen struktur von angeregten Molekülen. Zeitschrift für Naturforschung A 10 (1955) 541-545.

gN. Mataga. Y. Kaifu and M. Koizumi. Solvent effects upon fluorescence spectra and the dipole moments of excited molecules. Bul of the Chem Soc 29 (1956) 465-470.ğıN. G. Bakhshiev. Universal intermolecular interactions and their effect on the position of the electronic spectra of molecules in two component solutions. Opt Spect 16 (1964) 821-832.

hA. Chamma. P. Viallet. Determination du moment dipolaire d’une molcule dans un tat excit singule. Comptes rendus de l’Académie des Sciences 270 (1970) 1901-1904.
