# Supplementary figures and images for: From Absorption Shifts to Frontier Orbitals: A Comprehensive Optical Study of a Cyano-Functionalized Liquid Crystal
Source: Research Square preprint supplement (doi:10.21203/rs.3.rs-7200415/v1), 2025-08-29

**GRAPHICAL ABSTRACT**


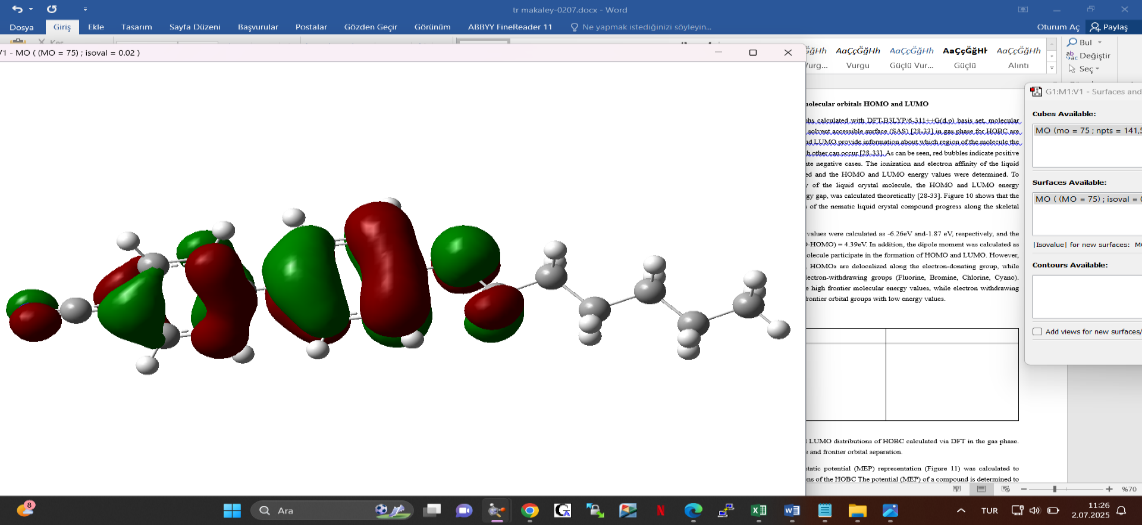

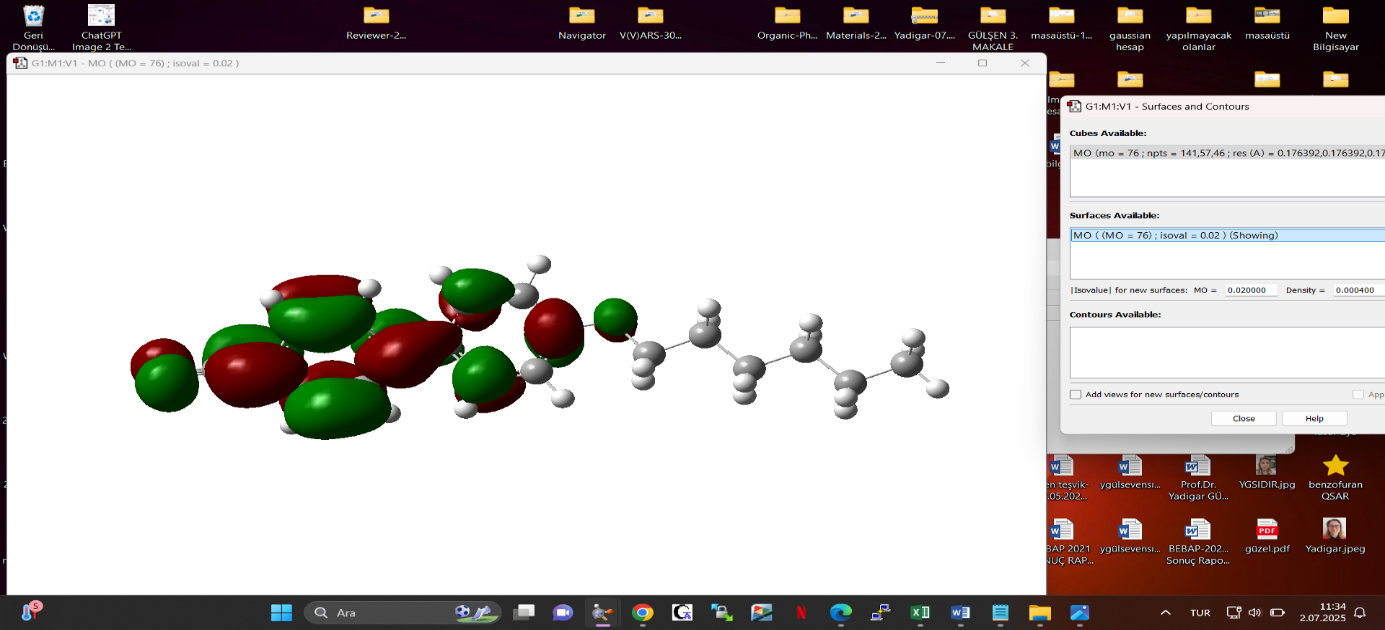

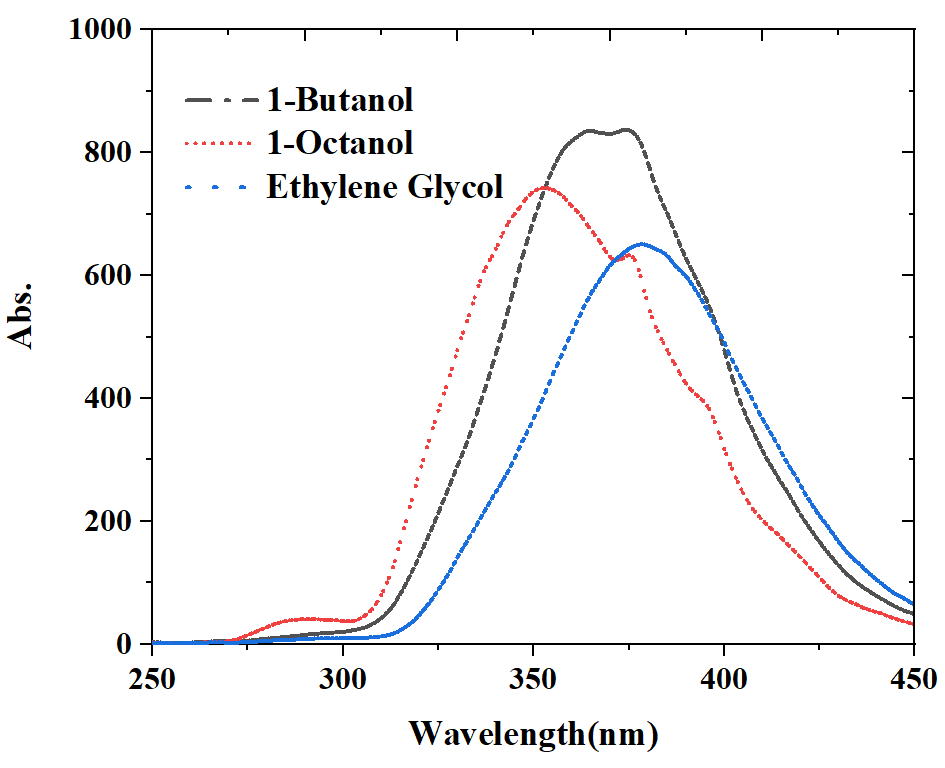

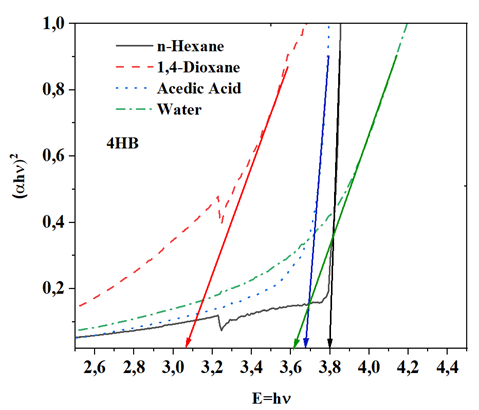

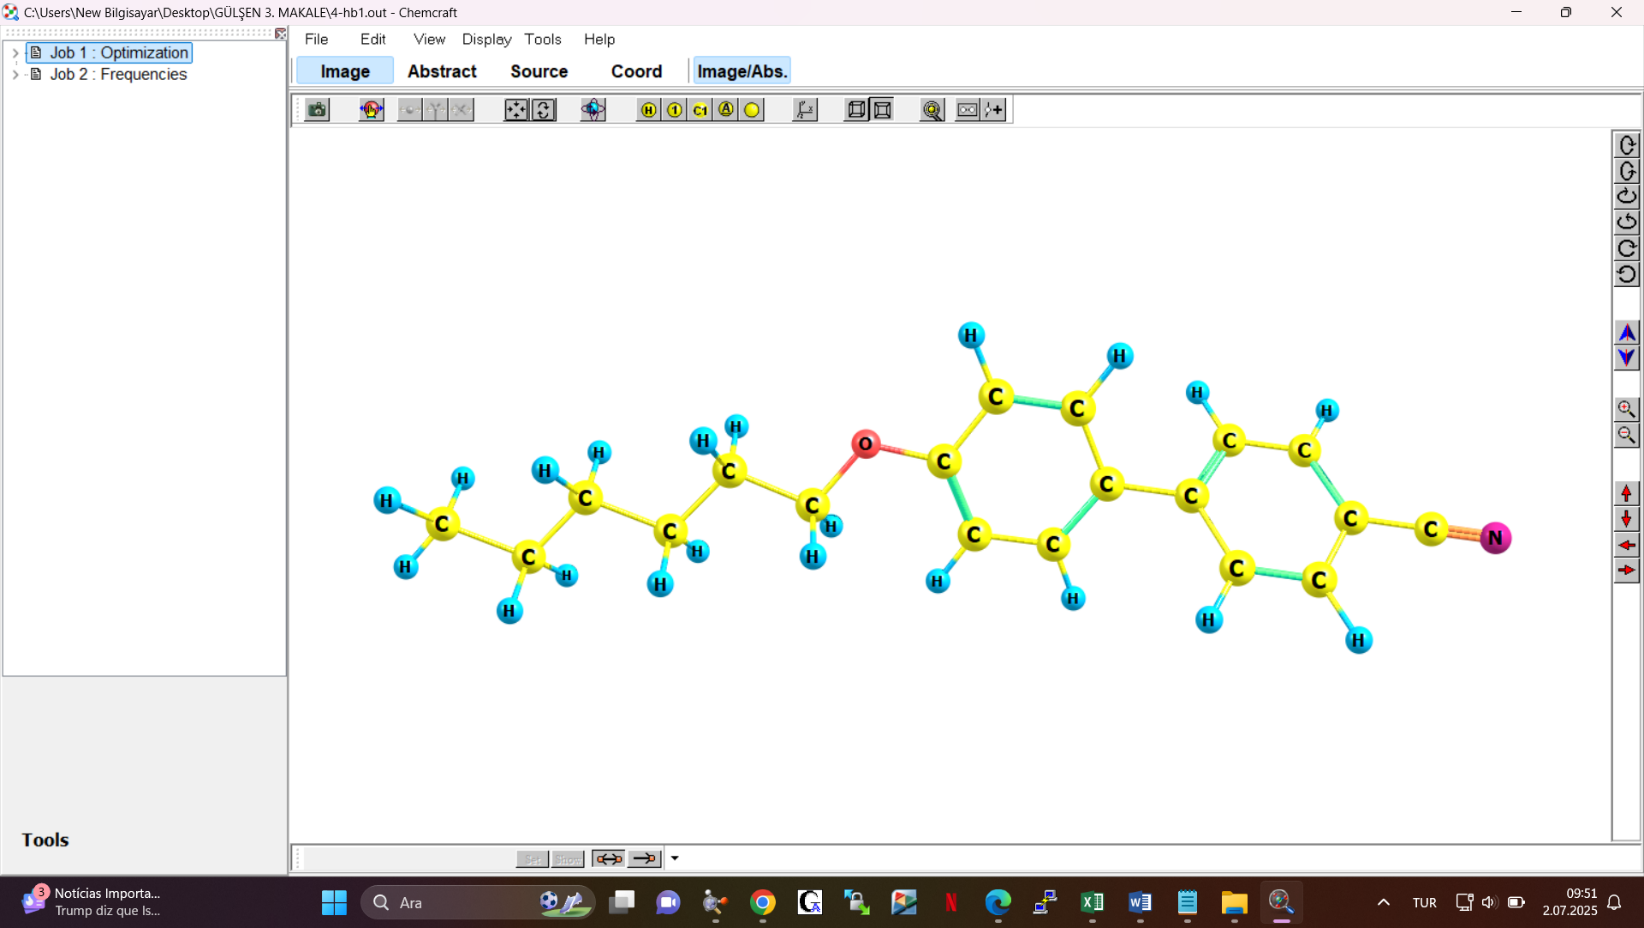


HOMO

LUMOO

Supplement: Supplementary file 2 [file f7643d215eeeddf91ad9428d.docx]
